# Supplementary material
Source: Springer Nature journal article supplement (https://www.springermedizin.de/resource/supplementary/12958_2010_724_MOESM1_ESM.pdf/9568694)
Supplement: MOESM1 [file 9568694]

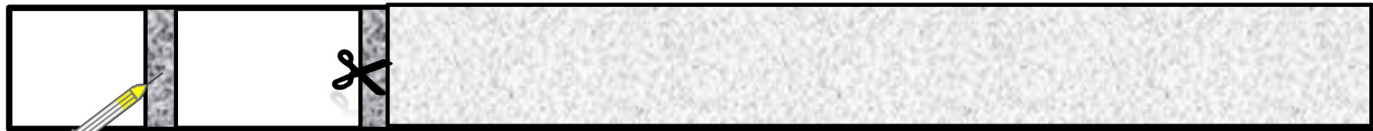

Vh or VE  
injection 10 days

uni or bilateral  
section of the SON  
24 days

vaginal smears

Animal  
sacrifice

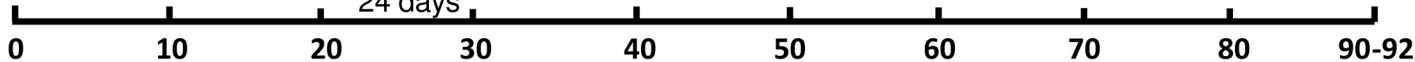

born

age of the animal
